# Supplementary material
Source: publisher figshare collection journal article supplement (https://acs.figshare.com/ndownloader/files/4762588)

## Supporting Information

# Heptamethine Cyanine Dyes with Robust C-C Bond at the Central Position of Chromophore

*Hyeran Lee, J. Christian Mason, and Samuel Achilefu\**

Department of Radiology, Washington University, St. Louis, Missouri 63110

|                                                           |     |
|-----------------------------------------------------------|-----|
| Table of Contents.....                                    | S1  |
| General Considerations.....                               | S2  |
| <sup>1</sup> H NMR spectrum of compound <b>2a</b> .....   | S2  |
| LC-MS spectrum of compound <b>2a</b> .....                | S3  |
| UV-Vis and Emission Spectra of Compound <b>2a,b</b> ..... | S4  |
| <sup>1</sup> H NMR spectrum of compound <b>2b</b> .....   | S5  |
| LC-MS spectrum of compound <b>2b</b> .....                | S6  |
| <sup>1</sup> H NMR spectrum of compound <b>2c</b> .....   | S7  |
| LC-MS spectrum of compound <b>2c</b> .....                | S8  |
| UV-Vis and Emission Spectra of Compound <b>2c</b> .....   | S9  |
| LC-MS spectrum of compound <b>3</b> .....                 | S10 |
| LC-MS spectrum of compound <b>5</b> .....                 | S11 |

**General Considerations.** All chemicals were purchased from commercial sources and were used without further purification.  $^1\text{H}$  NMR data were recorded on a 300 MHz at ambient temperature in  $\text{DMSO}-d_6$  and referenced to tetramethylsilane (TMS) as an internal standard. The absorption and emission spectra were determined using a spectrophotometer and fluorometer, respectively.

$^1\text{H}$  NMR spectrum of compound **2a**

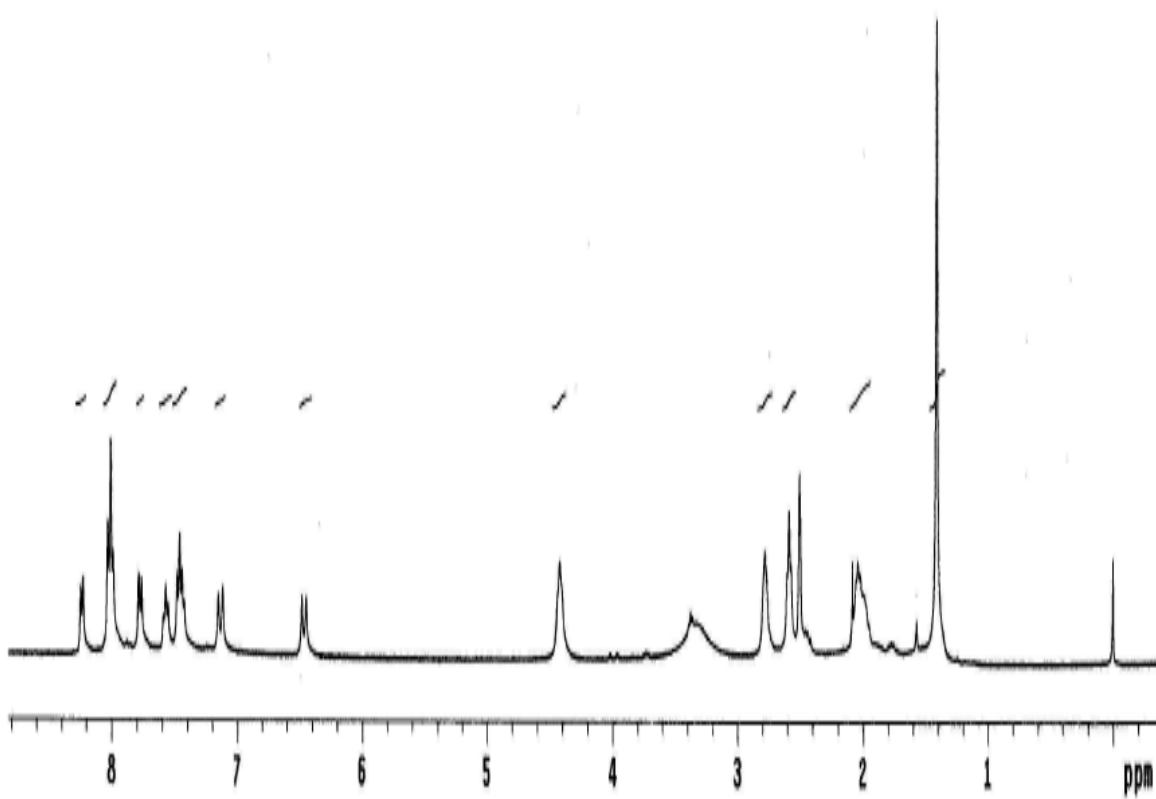

# LC-MS spectrum of compound **2a**

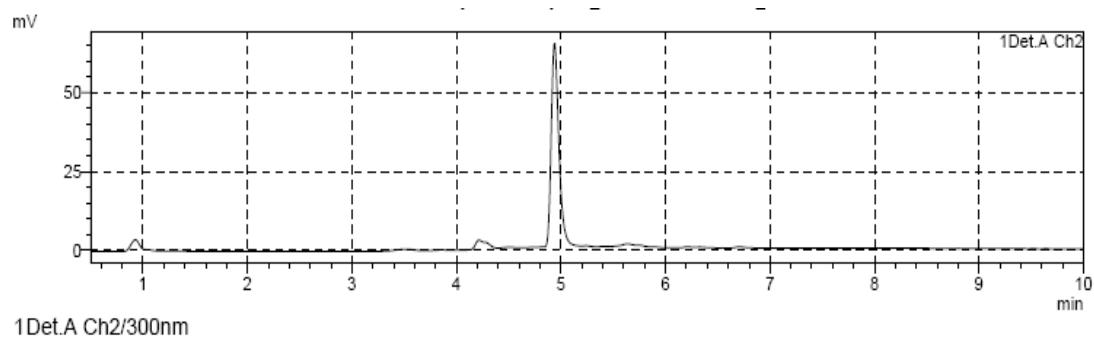

MS Spectrum Graph

Ret Time: 4.925(Scan#:296)  
BG Mode: ?  
Mass Peaks: 1692 Base Peak: 226.85(1486700) Polarity: Neg Segment1 - Event1

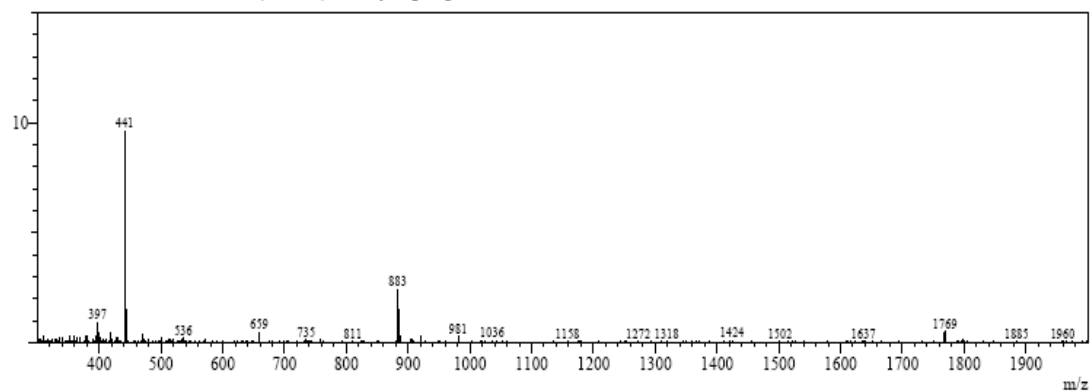

Normalized UV-Vis and Emission Spectra of Compound **2a,b** in 20% aqueous DMSO solution.

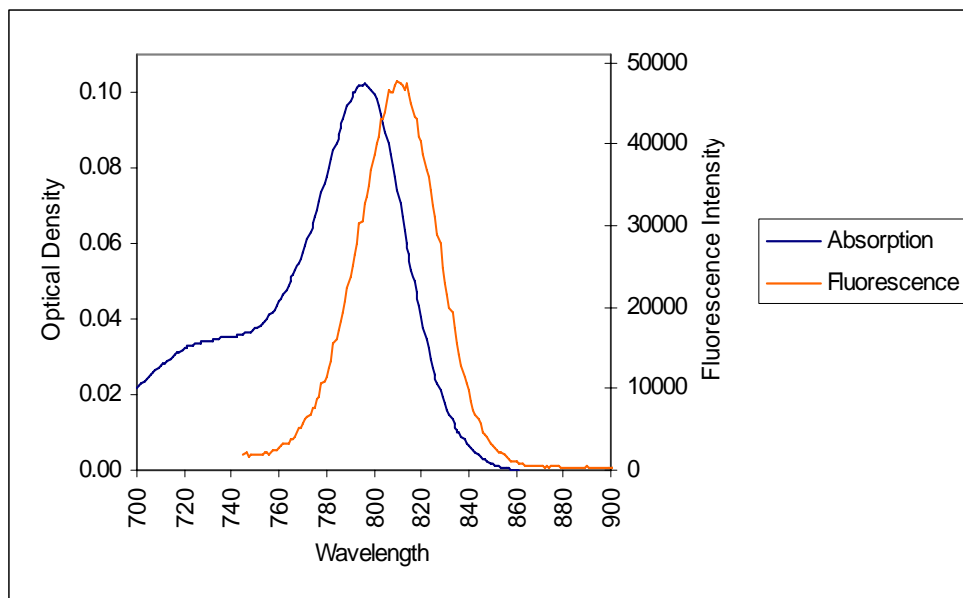

$^1\text{H}$  NMR spectrum of compound **2b**

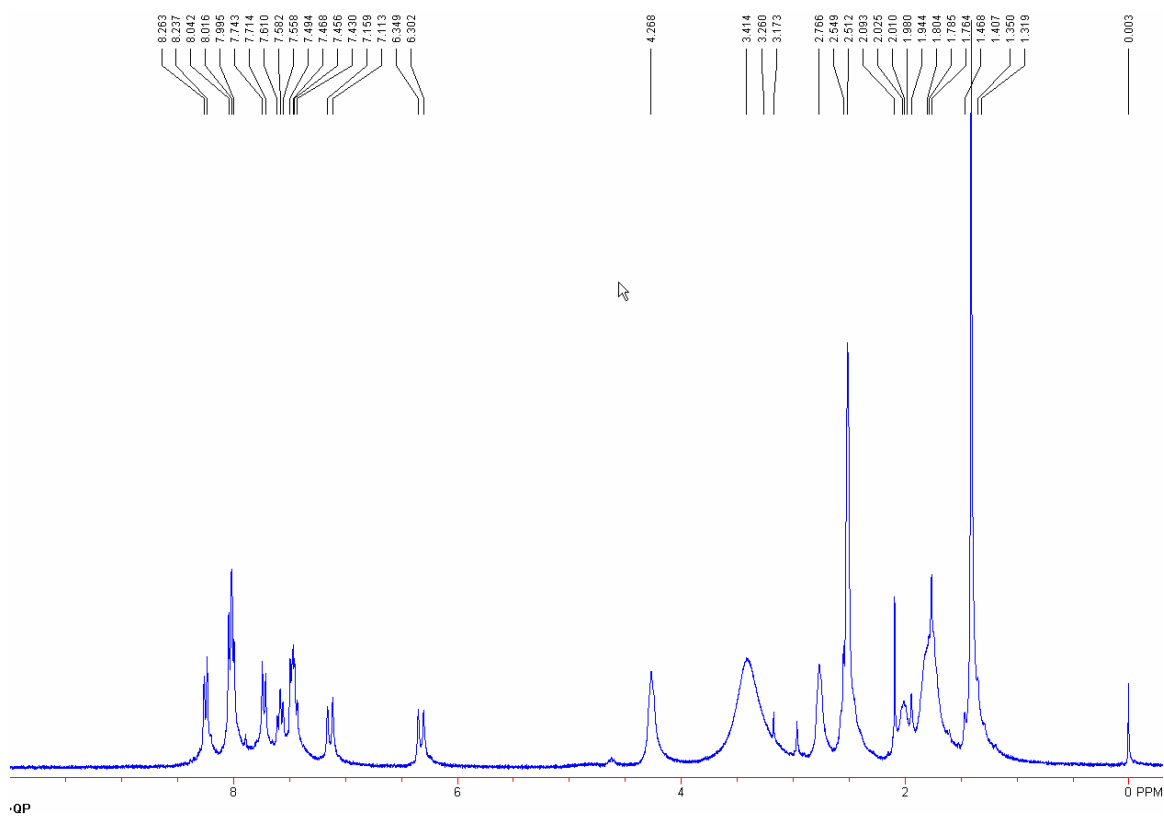

# LC-MS spectrum of compound **2b**

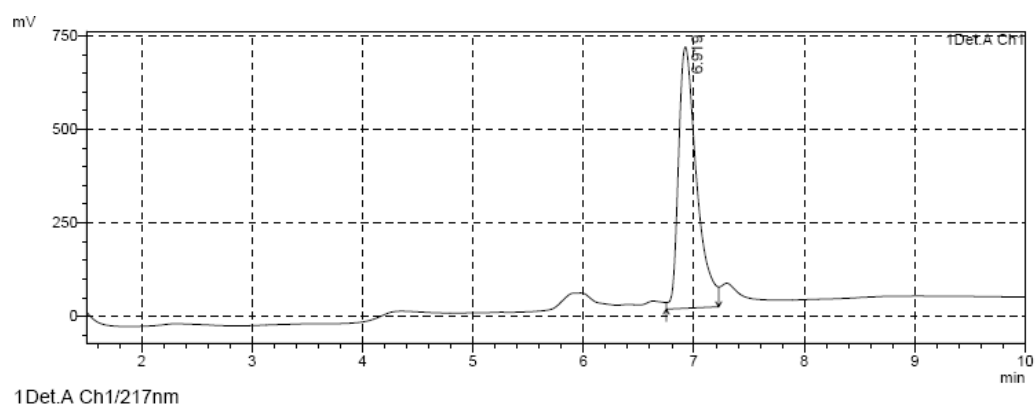

1Det.A Ch1/217nm

MS Spectrum Graph

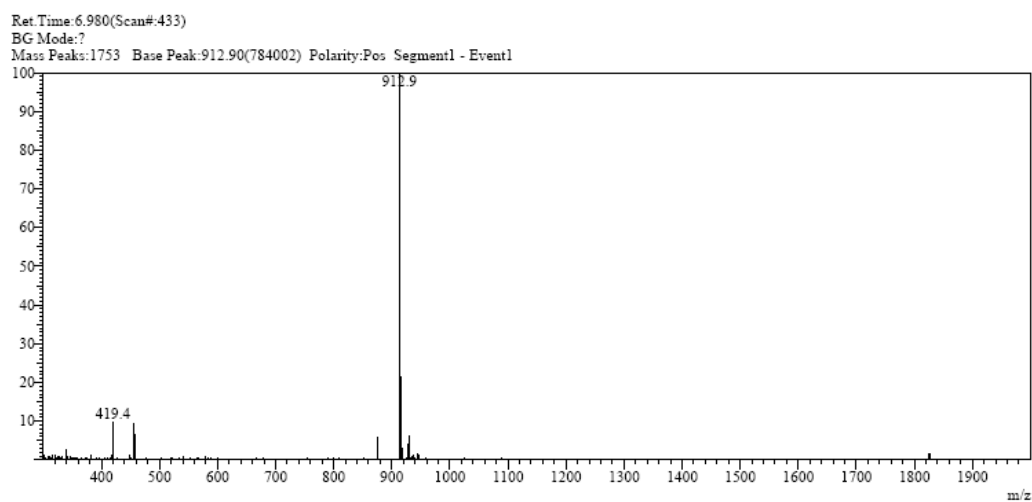

$^1\text{H}$  NMR spectrum of compound **2c**

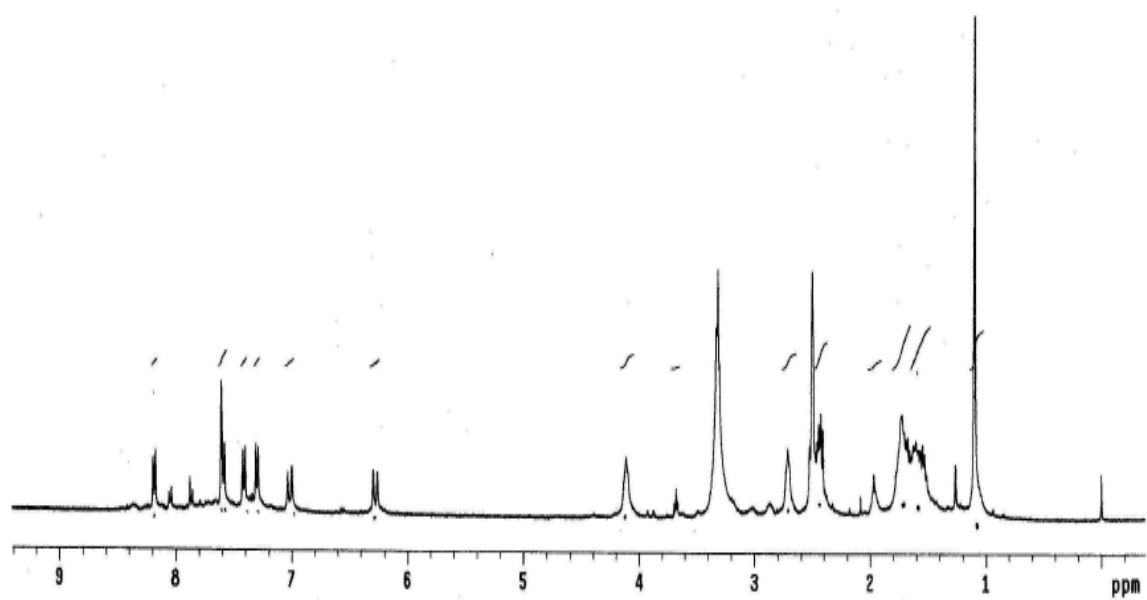

# LC-MS spectrum of compound **2c**

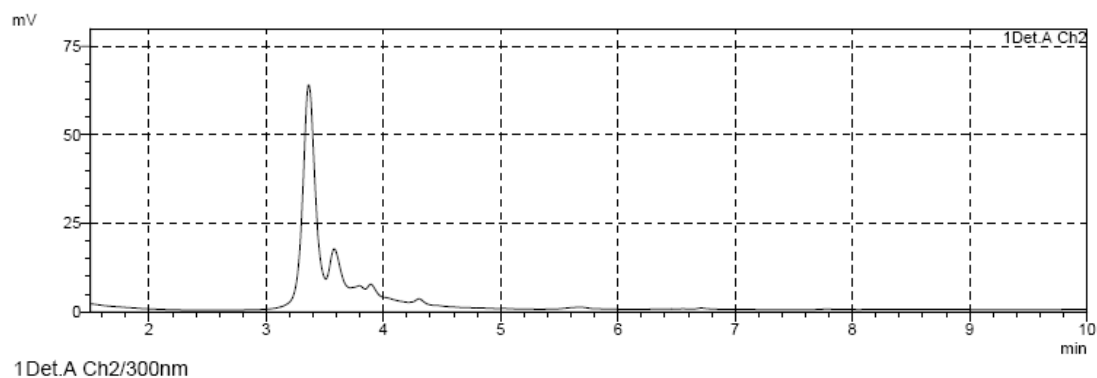

MS Spectrum Graph

Ret.Time:3.425(Scan#:196)

BG Mode:?

Mass Peaks:86 Base Peak:226.85(2690884) Polarity:Neg Segment1 -Event1

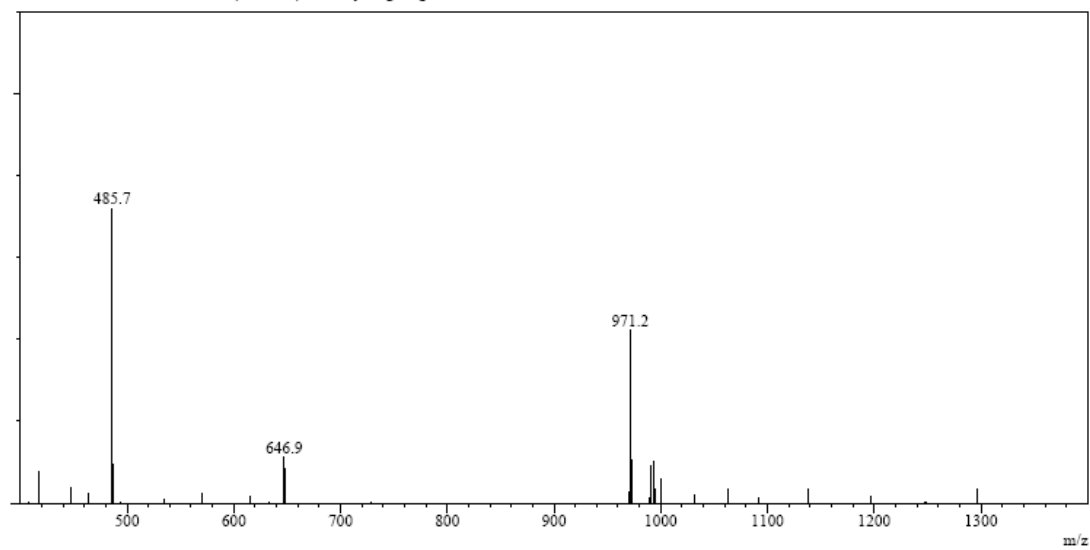

Normalized UV-Vis and Emission Spectra of Compound **2c** in 20% aqueous DMSO solution.

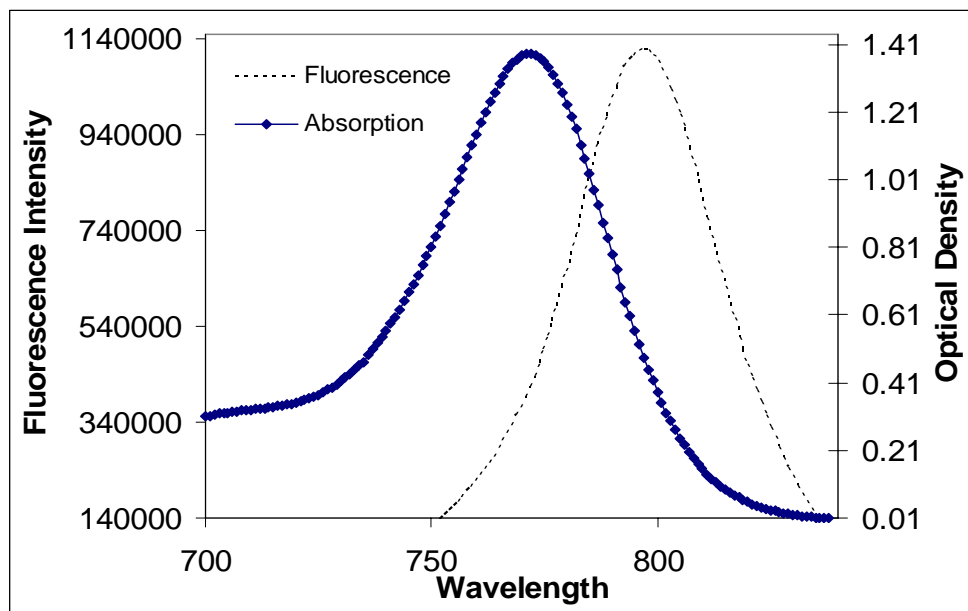

LC-MS spectrum of compound **3**.

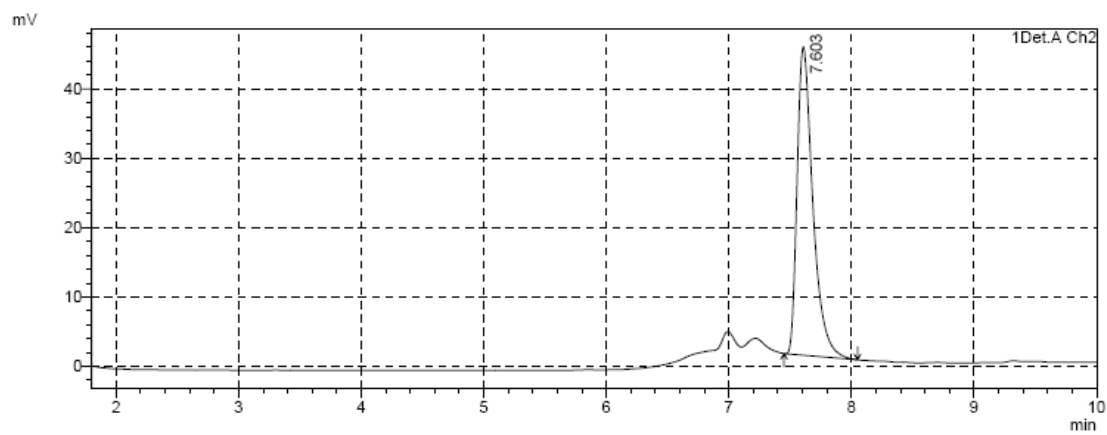

1Det.A Ch2/300nm

MS Spectrum Graph

Ret.Time:7.670(Scan#:479)

BG Mode:?

Mass Peaks:1429 Base Peak:574.80(87752) Polarity:Pos Segment1 - Event1

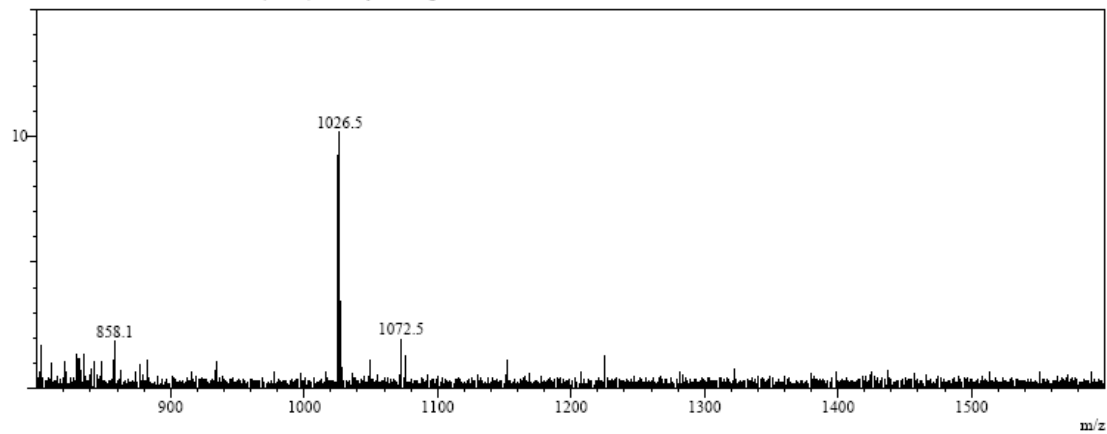

LC-MS spectrum of compound **5**.

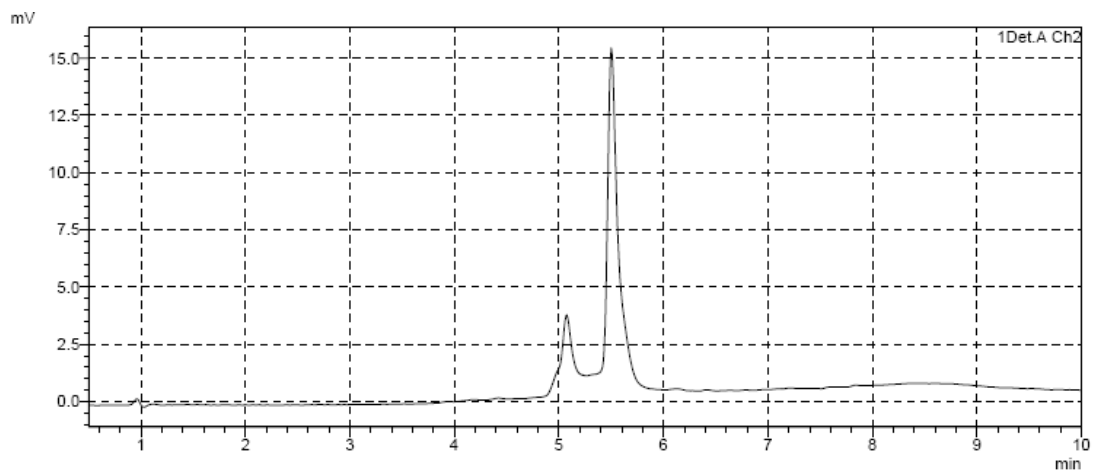

1Det.A Ch2/300nm

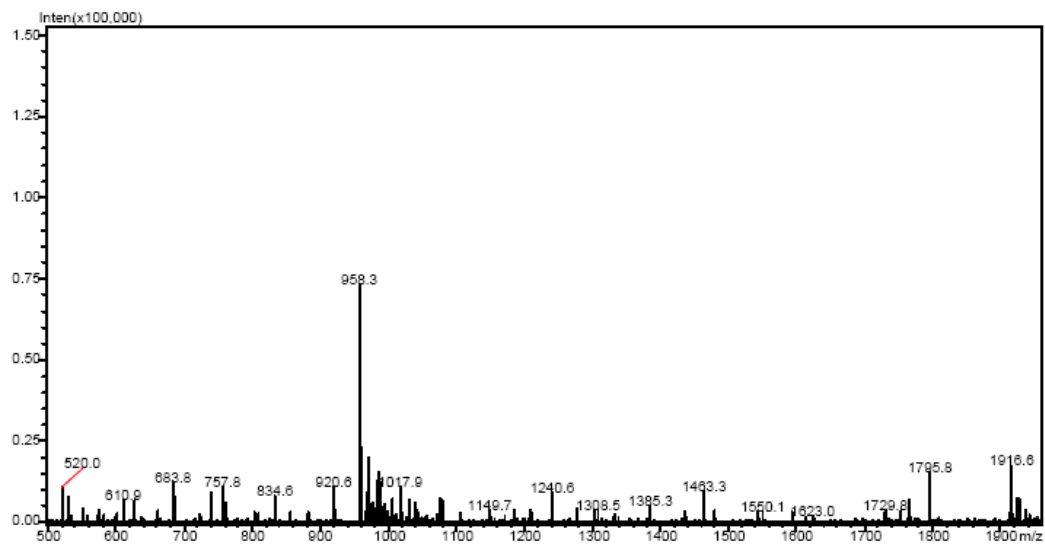

Supplement: Supplementary file 1 [file 4762588]
